# Supplementary material
Source: publisher figshare collection journal article supplement (https://acs.figshare.com/ndownloader/files/3752740)
Supplement: Supplementary file 1 [file 3752740]

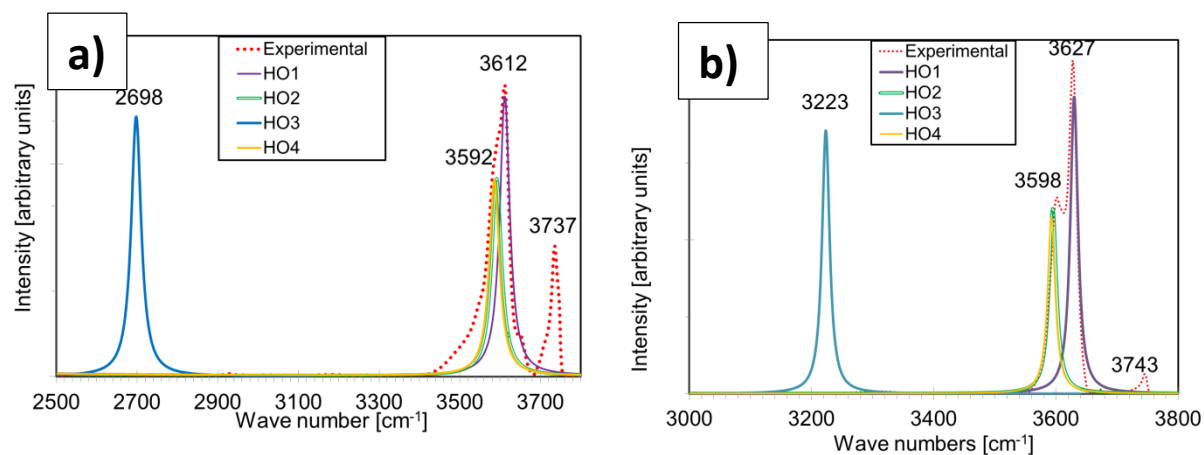

**Figure S1** Experimental TR (copied from Fig. 1) and computed OH spectra of a) H-CHA and b) H-SAPO-34 with all four HOn positions where n = the oxygen position numbers in Fig 2.

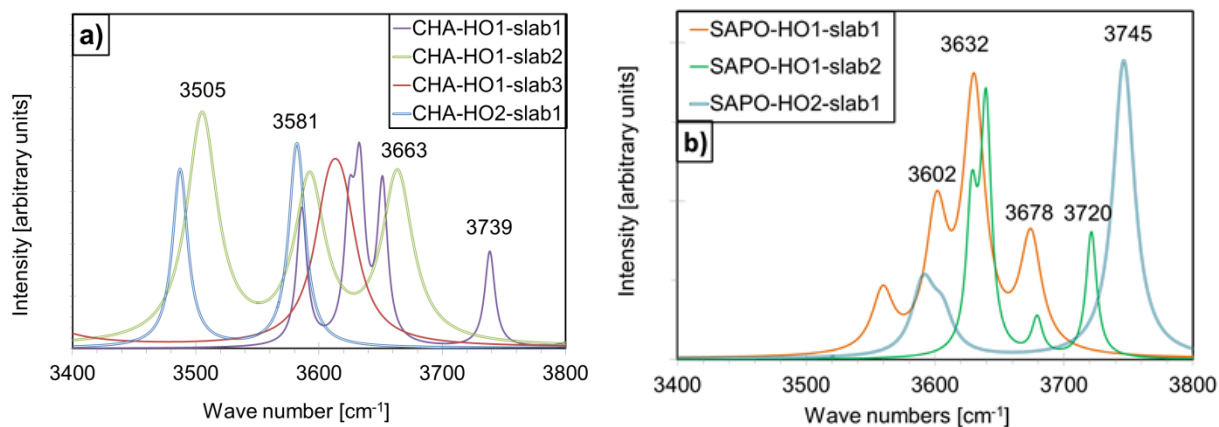

**Figure S2** Computed IR spectra of the vacuum slabs of a) H-CHA and b) H-SAPO, from which the matching models in Fig. 8 could be reconstructed by adding them together after adequate peak intensity adjustments. Here the spectra are shown at common scale for better visibility.
